# Supplementary material for: Epigenetic factor EPC1 is a master regulator of DNA damage response by interacting with E2F1 to silence death and activate metastasis-related gene signatures
Source: PubMed Central journal article supplement — Nucleic Acids Res. 2015 Sep 8;44(1):117–33. doi: 10.1093/nar/gkv885 (PMC4705687; doi:10.1093/nar/gkv885), 2015-09-08
Supplement: supp_gkv885_SUPPLEMENTARY_DATA_R1_edit.pdf [file supp_gkv885_SUPPLEMENTARY_DATA_R1_edit.pdf]

**Supplementary Table S1.** Primer sequences for mRNA expression analysis by PCR and for ChIP as well as generation of full-length EPC1 promoter construct

| <b>Primer name</b> | <b>Sequence</b>                |
|--------------------|--------------------------------|
| E2F1-fwd           | ACCAGGGTTTCCAGAGATGC           |
| E2F1-rev           | CACCACACAGACTCCTTCCC           |
| EPC1-fwd           | AGCCGATCTTATCCGACCGAA          |
| EPC1-rev           | TCCAAGGCCAGTTGCCAGTTT          |
| EZH2-fwd           | TATTCAGCGGGGCTCCAAAA           |
| EZH2-rev           | TGGATGGCTCTCTTGCGAAA           |
| EED-fwd            | TGCTGGAAACCTGGCAAGAT           |
| EED-rev            | AGCGCCAAATACTGGCATCA           |
| p27-fwd            | TTCATCAAGCAGTGATGTATCTGA       |
| p27-rev            | AAGAAGCCTGGCCTCAGAAG           |
| Bax-fwd            | CACCAGCTCTGAGCAGATCAT          |
| Bax-rev            | GCGGCAATCATCCTCTGCAG           |
| Bim-fwd            | TCTGTTGCCAGCCTGCATTGAT         |
| Bim-rev            | ATGGGAAAGCCTGCAACCAGAA         |
| Bcl-2-fwd          | CGTACAGTTCCACAAAGG             |
| Bcl-2-rev          | ATGTGTGTGGAGAGCGTC             |
| BIRC5-fwd          | TGCAAAGGAAACCAACAA             |
| BIRC5-rev          | TCAATCCATGGCAGCCAG             |
| GAPDH-fwd          | GTCATCCCTGAGCTGAAC             |
| GAPDH-rev          | CTCCTTGGAGGCCATGTG             |
| EPC1-P1-fwd        | GAGCGCACAGTGGAGTTTTA           |
| EPC1-P1-rev        | GCCCGAAACGACAGTTTACTC          |
| EPC1-P2-fwd        | AGCATCTGCCCTAATTCAGT           |
| EPC1-P2-rev        | CTCACTTTCTCACGCTCGCT           |
| EPC1-P3-fwd        | AACCGATGCCACCCATCTAT           |
| EPC1-P3-rev        | TCAAAGAGACTGCGGCTTCA           |
| EZH2-P-fwd         | CCCTCCACAAATGTGGATCT           |
| EZH2-P-rev         | CCAGCCTGAATATGATCACC           |
| EPC1-Prom-fwd      | GAGGTACCAAGCTAGTGACAGCTCATATCA |
| EPC1-Prom-rev      | GAAAGCTTCTCAGGCGCAGCAGATACCTCT |
| p27 ChIP fwd       | GGCCTCCCCCGCAGACCAC            |
| p27 ChIP rev       | GTTCCGCCACCTCCCCTCGTCC         |
| Bcl-2 ChIP fwd     | CTTCCCAATGAATCAGGAGTCG         |
| Bcl-2 ChIP rev     | GCGTCCTGCCTTCATTTATCCA         |

**Supplementary Table S2.** Interacting residues of E2F1 and EPC1 in interaction pose A and B

| <b>Residues forming H-bond<br/>(A: E2F1 &amp; B: EPC1)</b> | <b>Domains of E2F1</b> |
|------------------------------------------------------------|------------------------|
| <b>Interaction pose A</b>                                  |                        |
| A:ARG85:HN - B:GLU49:OE1                                   | Cyclin A/CDK2 binding  |
| A:ARG91:HE - B:ARG36:O                                     | Cyclin A/CDK2 binding  |
| A:ARG91:HH11 - B:GLU93:O                                   | Cyclin A/CDK2 binding  |
| A:ARG91:HH21 - B:SER33:O                                   | Cyclin A/CDK2 binding  |
| A:ARG91:HH22 - B:PHE94:O                                   | Cyclin A/CDK2 binding  |
| A:ARG109:HN - B:ALA84:O                                    | DNA binding            |
| A:GLY110:HN - B:ALA84:O                                    | DNA binding            |
| A:ALA379:HN - B:LYS129:O                                   | Transactivation        |
| B:MET1:HT1 - A:GLU280:O                                    | Marked box             |
| B:ASN35:HD22 - A:GLU354:O                                  | Marked box             |
| B:TYR85:HH - A:ASP436:OD1                                  | Transactivation        |
| B:SER88:HG - A:GLY106:O                                    | Cyclin A/CDK2 binding  |
| <b>Interaction pose B</b>                                  |                        |
| A:TYR100:HH - B:ARG461:O                                   | Cyclin A/CDK2 binding  |
| A:SER104:HG - B:GLY460:O                                   | Cyclin A/CDK2 binding  |
| A:ARG111:HH21 - B:TYR412:OH                                | Cyclin A/CDK2 binding  |
| A:ARG422:HH12 - B:CYS451:O                                 | Transactivation        |
| B:TYR412:HH - A:ASP423:OD1                                 | Transactivation        |
| B:ARG439:HH21 - A:SER121:O                                 | Cyclin A/CDK2 binding  |
| B:ARG450:HH11 - A:GLU419:OE1                               | Transactivation        |
| B:VAL465:HN - A:GLU103:OE1                                 | Cyclin A/CDK2 binding  |
| B:ARG469:HH12 - A:LEU351:O                                 | Marked box             |
| B:ASN499:HD21 - A:ARG109:O                                 | Cyclin A/CDK2 binding  |
| B:ASN499:HD21 - A:GLY110:O                                 | Cyclin A/CDK2 binding  |

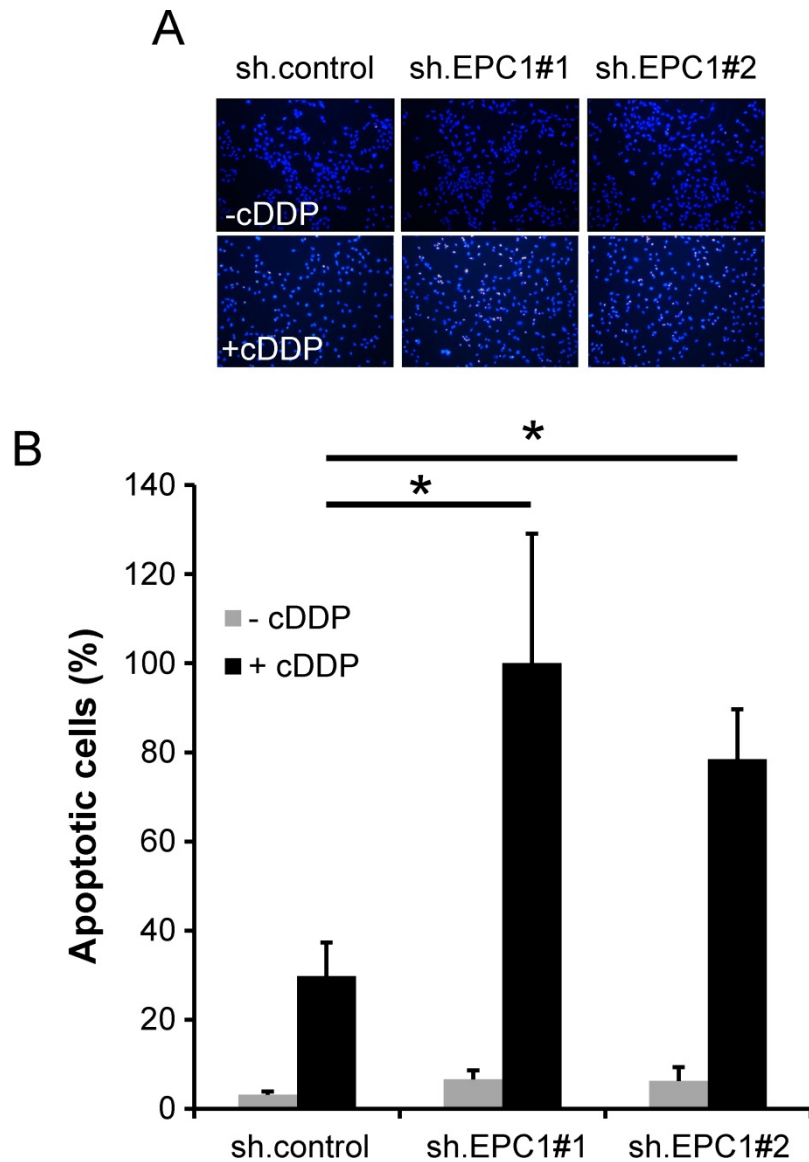

**Supplementary Figure S1 related to Figure 4.** EPC1 suppresses cisplatin (cDDP) induced apoptosis. **(A)** Representative photomicrographs of Hoechst 33342 stained (1  $\mu$ g/ml) SK-Mel-147 cells expressing indicated shRNAs in the presence or absence of cDDP (30  $\mu$ M). Cells exposed to cDDP exhibit characteristic chromatin condensation. **(B)** The bar graph represents the percentages of apoptotic cells relative to the sh.EPC1#1/+cDDP group. Quantification of apoptosis was determined by counting the number of apoptotic cells from four randomly chosen fields of view per condition with a minimum number of 500 cells scored in each. Data are presented as the mean with standard deviation in an experiment representative of several independent others. Asterisks indicate P values of <0.01.
